# Supplementary material for: Metal-phenolic self-assembly shielded probiotics in hydrogel reinforced wound healing with antibiotic treatment
Source: Royal Society of Chemistry journal article supplement (doi:10.1039/d3mh00033h), 2023-01-01
Supplement: d3mh00033h1.pdf [file d3mh00033h1.pdf]

### **Ethics approval and consent to participate**

All animal studies were approved by the Sichuan University Medical Ethics Committee. All animal procedures were performed in accordance with the guidelines for care and use of Laboratory Animals of Sichuan University in China (Approval number: KS2020330).
